# Supplementary material for: Multiplex Recombinase Polymerase Amplification Assay for Simultaneous Detection of Treponema pallidum and Haemophilus ducreyi in Yaws-Like Lesions
Source: PubMed Central journal article supplement (PMC7709673; doi:10.3390/tropicalmed5040157), 2020-10-06

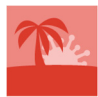

# Multiplex Recombinase Polymerase Amplification Assay for Simultaneous Detection of *Treponema pallidum* and *Haemophilus ducreyi* in Yaws-Like Lesions

## Assay Optimization

### Oligonucleotide Primer Design

*PolA* and *HhdA* genes of *T. pallidum* and *H. ducreyi*, respectively, were used as target sequences for RPA detection. RPA primers and probes were designed in accordance with the TwistDx manufacturer's recommendations (TwistDx Limited, United Kingdom). Three forward primers (FPs), 3 reverse primers (RPs) and one exo probe (P) each for *T. pallidum* and *H. ducreyi* (Table 1) were design by using the Molecular Evolution Genetics Analysis version 7 software (Mega7).

**Table S1.** Sequences for all Primers and Probes Used in the Assay Development.

| Name         | Sequence                                          |
|--------------|---------------------------------------------------|
| TP_RPA-FP1   | CAGTGTACATGTGCACGTAACACTAATGTTCG                  |
| TP_RPA-FP2   | GAGTGCACAGAACAGCATGGGGTATCTGCA                    |
| TP_RPA-FP3   | GTAACACTAATGTTCGAGACTGAAAAGGAGTGC                 |
| TP_RPA-RP1   | GTGAGCGTCTCATCATTCCAAAGACGTCGA                    |
| TP_RPA-RP2   | GCATAACAAGTGTGAGCGTCTCATCATT                      |
| TP_RPA-RP3   | GCATAACAAGTGTGAGCGTCTCATCATT                      |
| TP_RPA-Probe | GTATCTGCATCTGCTGTGCAGGATCCGGCATATGTCCAAGCTGTCATG  |
| Hd_RPA-FP1   | GCGTCATTCCGCCATCGGCCATTACGCCTA                    |
| Hd_RPA-FP2   | AGAAGTTAGCGTCATTCCGCCATCGGCCAT                    |
| Hd_RPA-FP3   | TACTCAGGCAACGGATACCCAACATGCA                      |
| Hd_RPA-RP1   | TAAATGACCTGTAACAGCCTGATTTACCTC                    |
| Hd_RPA-RP2   | CTTGTTACAGTAATAACAGTGCCTGACAATGA                  |
| Hd_RPA-RP3   | TAGCATCAATAGTGGTACCTTGTA                          |
| Hd_RPA-Probe | TACGCCTAAATCGTTAACTGCGGGATTAGGTATAGATGGCCATGGTAGT |

\*Highlighted oligonucleotides were those selected for assay development and validation.

### Primer Screening and Selection

The 3 forward primers and 3 reverse primers together with probe for each target were tested in combinations using  $10^5$  molecular standard DNA. The pairs with highest fluorescent intensity in the shortest time were selected and retested with  $10^2$  DNA copies. The pair with the best results for both target were selected (see Figure 1 and 2).

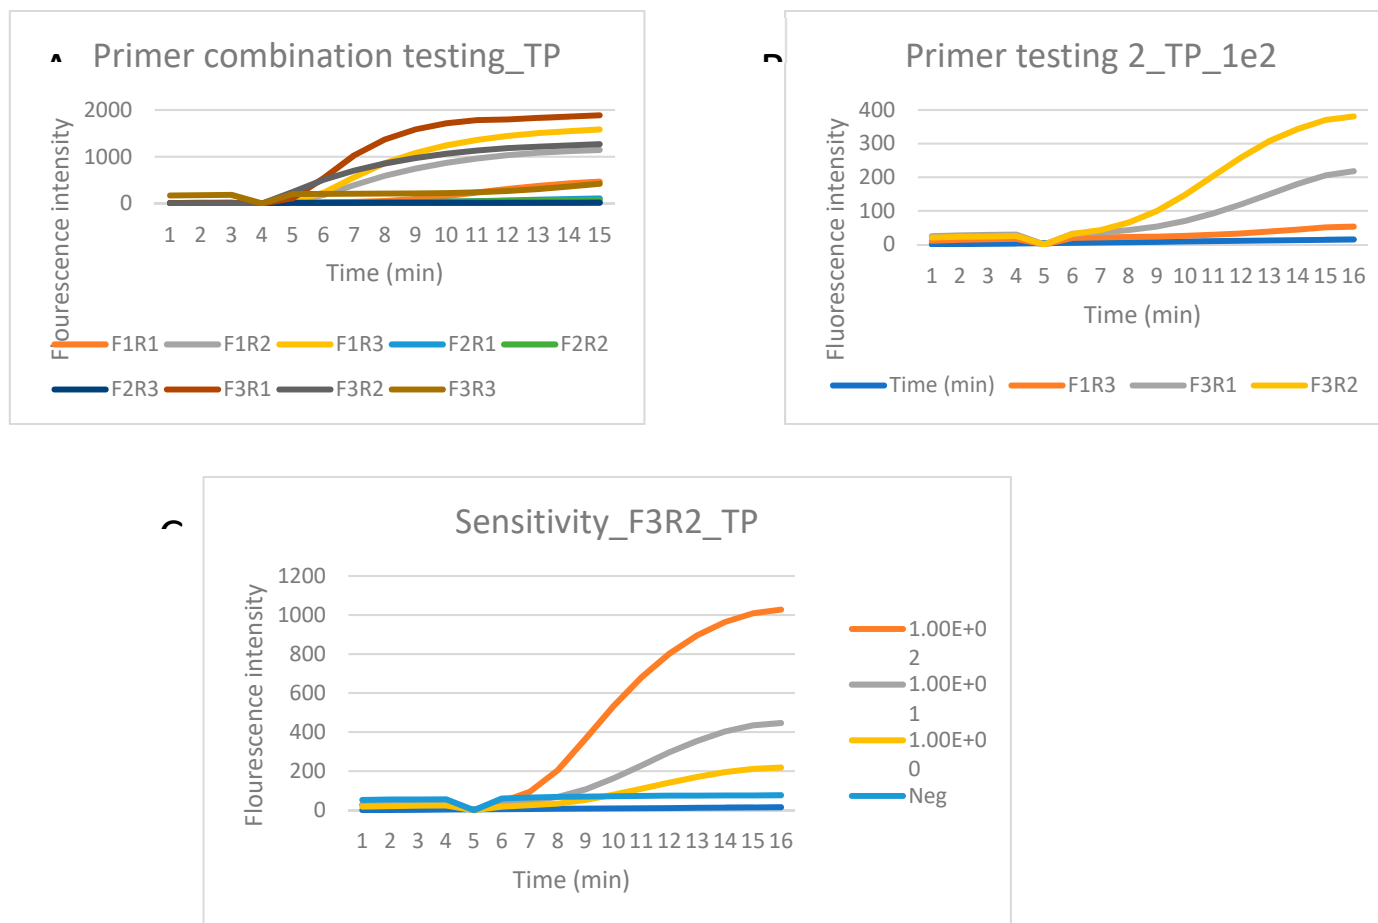

**Figure S1.** Primer combination testing for PoIA of *T. pallidum*; (A) Each forward primer was paired and a reverse primer together with a probe (9 primer/probe pairs) and tested. (B) The 3 best performing pairs, F1R3, F3R1 and F3R2 were tested with a lower concentration of the standard DNA (C) The best of the 3 pairs, F3R2 was further tested with lower DNA copies to determine the lowest limit of detection.

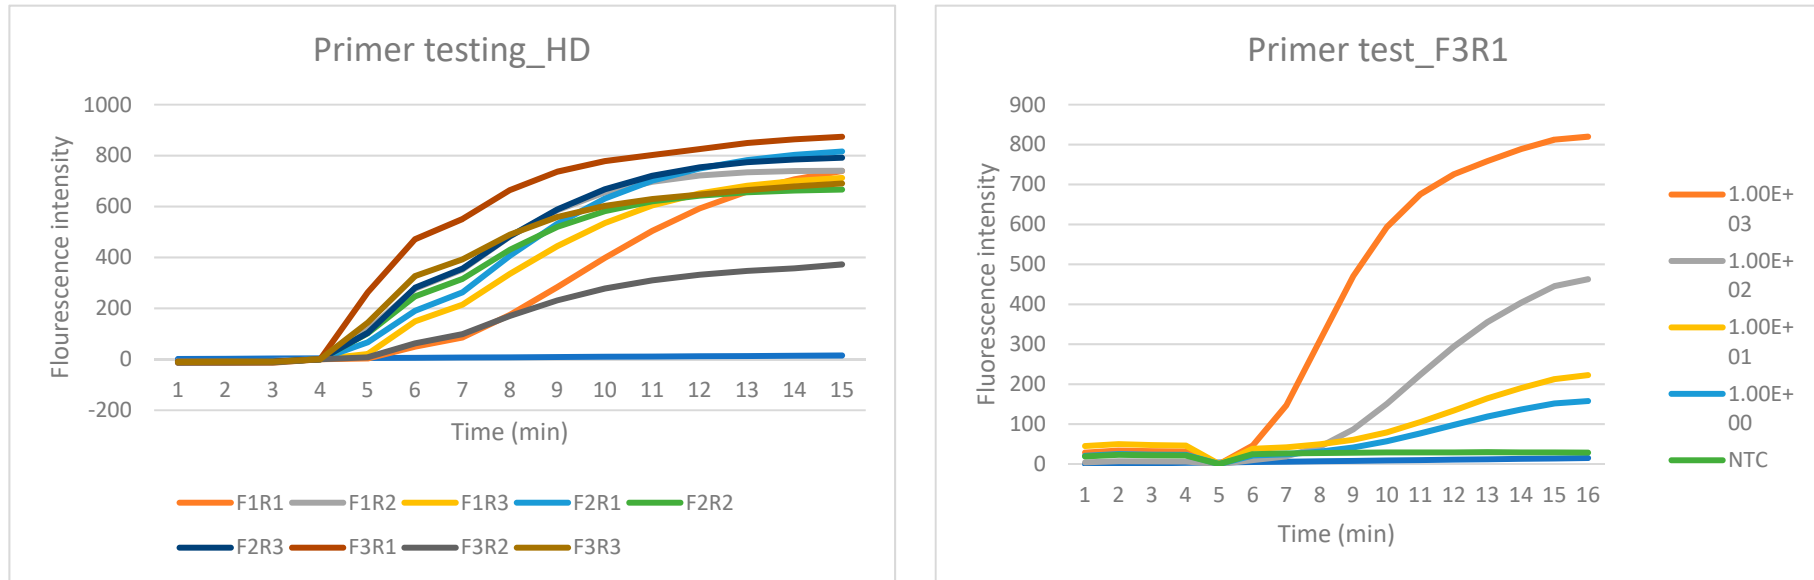

**Figure S2.** Primer combination testing for hhdA of *H. ducreyi*; (A) Each forward primer was paired and a reverse primer together with a probe (9 primer/probe pairs) and tested. (B) The best of the 3 pairs, F3R1 was further tested with lower DNA copies to determine the lowest limit of detection.

### In silico Analysis of Primers and Probes

BLASTn analysis queries alignments were performed with the oligonucleotide primer and probe sequences of the TPHD-RPA duplex assay with publicly available nucleic acid sequences for *T. pallidum* and *H. ducreyi* in GenBank as of July, 2019 to demonstrate the predicted inclusivity TPHD duplex RPA assay. Results of BLAST analysis shown below;

| TP_RPA_FP3 (Forward Primer)                                                                             |             |              |            |
|---------------------------------------------------------------------------------------------------------|-------------|--------------|------------|
| Organisms                                                                                               | Sequence ID | Expect value | % homology |
| Treponema pallidum subsp. pertenue strain CDC-1 chromosome                                              | CP024750    | 7.00E-07     | 100        |
| Treponema pallidum subsp. pertenue strain Sei Geringging K403 chromosome                                | CP024089    | 7.00E-07     | 100        |
| Treponema pallidum subsp. pertenue strain Kampung Dalan K363 chromosome                                 | CP024088    | 7.00E-07     | 100        |
| Treponema pallidum subsp. pertenue strain LMNP-1 genome sequence                                        | CP021113    | 7.00E-07     | 100        |
| Treponema pallidum subsp. pertenue strain CDC 2575                                                      | CP020366    | 7.00E-07     | 100        |
| Treponema pallidum subsp. pertenue strain Ghana-051                                                     | CP020365    | 7.00E-07     | 100        |
| Treponema pallidum subsp. endemicum strain Iraq B chromosome                                            | CP032303    | 7.00E-07     | 100        |
| Treponema pallidum subsp. endemicum strain Iraq B DNA-directed DNA polymerase I (poA) gene, partial cds | KY120819    | 7.00E-07     | 100        |
| Treponema pallidum subsp. endemicum isolate 11q/j DNA-directed DNA polymerase I (poA) gene, partial cds | KY120778    | 7.00E-07     | 100        |
| Treponema pallidum subsp. endemicum str. Bosnia A genome                                                | CP007548    | 7.00E-07     | 100        |
| Treponema pallidum str. Fribourg-Blanc, complete genome                                                 | CP003902    | 7.00E-07     | 100        |
| Treponema pallidum subsp. pertenue str. CDC2, complete genome                                           | CP002375    | 7.00E-07     | 100        |
| Treponema pallidum subsp. pertenue str. SamoaD, complete genome                                         | CP002374    | 7.00E-07     | 100        |
| Treponema pallidum strain UW-148B2 chromosome                                                           | CP045004    | 3.00E-05     | 100        |
| Treponema pallidum strain UW-148B chromosome                                                            | CP045005    | 3.00E-05     | 100        |
| Treponema pallidum PoA gene, partial cds                                                                | U57757      | 3.00E-05     | 100        |
| Treponema pallidum subsp. pallidum strain X-4 chromosome, complete genome                               | CP040555    | 3.00E-05     | 100        |
| Treponema pallidum subsp. pallidum strain Philadelphia 1 chromosome                                     | CP035193    | 3.00E-05     | 100        |
| Treponema pallidum subsp. pallidum strain Grady chromosome                                              | CP035104    | 3.00E-05     | 100        |
| Treponema pallidum subsp. pallidum strain Seattle Nichols genome                                        | CP010422    | 3.00E-05     | 100        |
| Treponema pallidum subsp. pallidum str. Nichols, complete genome                                        | CP004010    | 3.00E-05     | 100        |
| Treponema pallidum subsp. pallidum str. Nichols complete genome                                         | AE000520    | 3.00E-05     | 100        |

| TP_RPA_RP2 (Reverse Primer)                         |              |              |            |
|-----------------------------------------------------|--------------|--------------|------------|
| Organisms                                           | Sequence ID  | Expect value | % homology |
| Treponema pallidum subsp. pallidum                  | CP040555     | 9.00E-06     | 100%       |
| Treponema pallidum subsp. pertenue (yaws treponeme) | CP024750     | 9.00E-06     | 100%       |
| Treponema pallidum subsp. endemicum                 | CP032303     | 9.00E-06     | 100%       |
| Treponema pallidum subsp. endemicum str. Bosnia A   | CP007548     | 9.00E-06     | 100%       |
| Treponema pallidum subsp. pallidum str. Sea 81-4    | CP003679     | 9.00E-06     | 100%       |
| Treponema pallidum subsp. pallidum str. Nichols     | CP004010     | 9.00E-06     | 100%       |
| Treponema pallidum subsp. pallidum SS14             | CP004011     | 9.00E-06     | 100%       |
| Treponema pallidum str. Fribourg-Blanc              | CP003902     | 9.00E-06     | 100%       |
| Treponema pallidum subsp. pallidum str. Mexico A    | CP003064     | 9.00E-06     | 100%       |
| Treponema pallidum subsp. pallidum DAL-1            | CP003115     | 9.00E-06     | 100%       |
| Treponema pallidum subsp. pertenue str. Gauthier    | CP002376     | 9.00E-06     | 100%       |
| Treponema pallidum subsp. pertenue str. CDC2        | CP002375     | 9.00E-06     | 100%       |
| Treponema pallidum subsp. pertenue str. SamoaD      | CP002374     | 9.00E-06     | 100%       |
| Treponema paraluisuniculi Cuniculi A                | CP002103     | 9.00E-06     | 100%       |
| Treponema pallidum subsp. pallidum str. Chicago     | CP001752     | 9.00E-06     | 100%       |
| Canis lupus familiaris (dog)                        | CP050574     | 8.4          | 65%        |
| Neostethus bicornis                                 | LR738563     | 8.4          | 93%        |
| Sphaeramia orbicularis (orbiculate cardinalfish)    | LR597473     | 8.4          | 62%        |
| Cyanistes caeruleus (blue tit)                      | XM_023924328 | 8.4          | 65%        |
| Ochrobactrum pituitosum                             | CP018782     | 8.4          | 65%        |
| Mus musculus (house mouse)                          | AC130828     | 8.4          | 65%        |
| Kosakonia sp. MUSA4                                 | CP025697     | 33           | 62%        |
| Schistosoma mansoni                                 | HE601630     | 33           | 62%        |

| TP_RPA_P1 (Probe)                                   |             |              |            |
|-----------------------------------------------------|-------------|--------------|------------|
| Organisms                                           | Sequence ID | Expect value | % homology |
| Treponema pallidum subsp. pallidum                  | CP040555    | 5.00E-15     | 100%       |
| Treponema pallidum subsp. pertenue (yaws treponeme) | CP024750    | 5.00E-15     | 100%       |
| Treponema pallidum subsp. endemicum                 | CP032303    | 5.00E-15     | 100%       |
| Treponema pallidum subsp. endemicum str. Bosnia A   | CP007548    | 5.00E-15     | 100%       |
| Treponema pallidum subsp. pallidum str. Sea 81-4    | CP003679    | 5.00E-15     | 100%       |
| Treponema pallidum subsp. pallidum str. Nichols     | CP004010    | 5.00E-15     | 100%       |
| Treponema pallidum subsp. pallidum SS14             | CP004011    | 5.00E-15     | 100%       |
| Treponema pallidum str. Fribourg-Blanc              | CP003902    | 5.00E-15     | 100%       |
| Treponema pallidum subsp. pallidum str. Mexico A    | CP003064    | 5.00E-15     | 100%       |
| Treponema pallidum subsp. pertenue str. Gauthier    | CP002376    | 5.00E-15     | 100%       |
| Treponema pallidum subsp. pertenue str. CDC2        | CP002375    | 5.00E-15     | 100%       |
| Treponema pallidum subsp. pertenue str. SamoaD      | CP002374    | 5.00E-15     | 100%       |
| Treponema paraluisuniculi Cuniculi A                | CP002103    | 5.00E-15     | 100%       |
| Treponema pallidum subsp. pallidum str. Chicago     | CP001752    | 5.00E-15     | 100%       |

| Hd_RPA_FP3 (Forward Primer)                        |              |              |            |
|----------------------------------------------------|--------------|--------------|------------|
| Organisms                                          | Sequence ID  | Expect value | % homology |
| Haemophilus ducreyi                                | LR134364     | 3.00E-05     | 100%       |
| [Haemophilus] ducreyi strain GHA3, complete genome | CP015431     | 3.00E-05     | 100%       |
| [Haemophilus] ducreyi strain GHA1, complete genome | CP015429     | 3.00E-05     | 100%       |
| [Haemophilus] ducreyi strain VAN3, complete genome | CP015426     | 3.00E-05     | 100%       |
| [Haemophilus] ducreyi 35000HP                      | AE017143     | 3.00E-05     | 100%       |
| Monodelphis domestica                              | XR_001622693 | 1.9          | 71%        |
| Lotus japonicus                                    | AP022631     | 29           | 67%        |
| Legionella pneumophila subsp. pneumophila          | CP016874     | 29           | 64%        |
| Atlantibacter hermannii                            | CP049608     | 29           | 64%        |
| Legionella pneumophila                             | CP048618     | 29           | 64%        |
| Legionella pneumophila subsp. fraseri              | CP017457     | 29           | 64%        |

| Hd_RPA_RP1 (Forward Primer)            |             |              |            |
|----------------------------------------|-------------|--------------|------------|
| Organisms                              | Sequence ID | Expect value | % homology |
| [Haemophilus] ducreyi strain GHA5      | CP015432    | 3.00E-06     | 100%       |
| [Haemophilus] ducreyi strain GHA3      | CP015431    | 3.00E-06     | 100%       |
| [Haemophilus] ducreyi strain GHA2      | CP015430    | 3.00E-06     | 100%       |
| [Haemophilus] ducreyi strain VAN3      | CP015426    | 3.00E-06     | 100%       |
| [Haemophilus] ducreyi strain VAN2      | CP015425    | 3.00E-06     | 100%       |
| [Haemophilus] ducreyi strain 33921     | CP011228    | 3.00E-06     | 100%       |
| [Haemophilus] ducreyi strain NZV1      | CP011227    | 3.00E-06     | 100%       |
| [Haemophilus] ducreyi strain 82-029362 | CP011222    | 3.00E-06     | 100%       |
| [Haemophilus] ducreyi strain NZS4      | CP011221    | 3.00E-06     | 100%       |
| [Haemophilus] ducreyi 35000HP          | AE017143    | 3.00E-06     | 100%       |
| <i>Pseudomonas aeruginosa</i>          | LR584237    | 0.6          | 64%        |
| <i>Gossypium raimondii</i>             | CP032557    | 2.4          | 64%        |
| <i>Pseudomonas phage PAN70</i>         | KJ959591    | 2.4          | 64%        |

| Hd_RPA_P1 (Forward Primer)                                |             |              |            |
|-----------------------------------------------------------|-------------|--------------|------------|
| Organisms                                                 | Sequence ID | Expect value | % homology |
| [Haemophilus] ducreyi strain GHA3, complete genome        | CP015431    | 5.00E-15     | 100%       |
| [Haemophilus] ducreyi strain GHA2, complete genome        | CP015430    | 5.00E-15     | 100%       |
| [Haemophilus] ducreyi strain VAN5, complete genome        | CP015428    | 5.00E-15     | 100%       |
| [Haemophilus] ducreyi strain NZS4 chromosome              | CP011221    | 5.00E-15     | 100%       |
| [Haemophilus] ducreyi strain NZS3 chromosome              | CP011220    | 5.00E-15     | 100%       |
| [Haemophilus] ducreyi 35000HP chromosome, complete genome | AE017143    | 5.00E-15     | 100%       |

## Molecular Standard

Fragment DNA containing conserved regions for PolA gene of *T. pallidum* and HhdA gene of *H. ducreyi* was synthesized by GeneArt (Invitrogen, Darmstadt, Germany). We diluted the plasmid DNA in 10 mM Tris to adjusted concentration. The defined conserved regions used for the synthesis of the plasmid DNA are indicated below.

*Treponema pallidum* PolA gene, partial cds

GenBank: U57757.1

Nucleotide range:1836 -2135

GATTTTCGATCTGCTTTCAGGAAGCAGAGGCTTTTTATGTTCTCTTATTGTTCCGGACG  
 TTTCTCTTCATACCGAGTCAACTCAGTGTACATGTGCACGTAACACTAATGTCGAGACTGAA  
 AAGGAGTGCACAGAACAGCATGGGGTATCTGCATCTGCTGTGCAGGATCCGGCATATGTCC  
 AAGCTGTCATGCACCAGCTTCGACGTCTTTGGAATGATGAGACGCTCACACTTGTTATGCAT  
 AATGGAAAGTTTGATTATCACGTTATGCATCGTGCAGGCGTTTTTGAGCACTGTG

*Haemophilus ducreyi* hemolytic cytotoxin HhdA and HhdB precursors (hhdA, hhdB) genes, complete cds

Sequence ID: [U32175.1](#)

Nucleotide range: 5031 – 5330 HhdA

GGTAAAGCTGATAGCGCTAAATTTACTCAGGCAACGGATACCCAACATGCAAATGGT  
 ATAAAAGTTAGTGTAGAAGTGGGGGAGAAGTTAGCGTCATTCCGCCATCGGCCATTACGC  
 CTAATCGTTAACTGCGGGATTAGGTATAGATGGCCATGGTAGTGAGGTAAATCAGGCTGT  
 TACAGGTCATTTAAAGGGCGATAATGTGTCTATTGAAACTAAAAATGCTTTTTTACAAGGTA  
 CCACTATTGATGCTAAAAATAAATCATTGTCAGGCACTGTTATTACTGAACAAGCACA

## Analytical sensitivity and specificity

We have described how we determined the analytical sensitivity and limit of detection in the manuscript.

We generated analytical specificity data by in silico analysis. We then tested a panel of about 30 pathogens (table 2). In all cases the TPHD RPA assay tested negative, demonstrating high specificity for the assay.

**Table 2.** List of Bacteria and Parasite Species and Strains Used for Determining the Cross-Reactivity of the Duplex RPA Assay.

| Name of Bacteria                              | Source                                             |
|-----------------------------------------------|----------------------------------------------------|
| <i>Nocardia ssp.</i>                          | DSMZ ID: 43757                                     |
| <i>Enterococcus faecalis</i>                  | DSMZ ID: 1103                                      |
| <i>Streptococcus agalactiae</i>               | DSMZ ID: 2134                                      |
| <i>Listeria monocytogenes</i>                 | DSMZ ID: 15675                                     |
| <i>Staphylococcus aureus</i>                  | DSMZ ID: 799                                       |
| <i>E. coli</i>                                | DSMZ ID: 30083                                     |
| <i>Pseudomonas aeruginosa</i>                 | DSMZ ID: 939                                       |
| <i>Clostridium perfringens</i>                | DSMZ ID: 756                                       |
| <i>Plasmodium falciparum</i>                  | University of Ibadan, Nigeria                      |
| <i>Leishmania major</i>                       | American Type Culture Collection,<br>Manassas, USA |
| <i>Leishmania donovani</i>                    |                                                    |
| <i>Leishmania aethiopica</i>                  |                                                    |
| <i>Leishmania infantum</i>                    |                                                    |
| <i>Rickettsia africae</i>                     | BNITM Hamburg, Germany                             |
| <i>Rickettsia rickettsia</i>                  |                                                    |
| <i>Rickettsia conorii</i>                     |                                                    |
| <i>Rickettsia Helvetica</i>                   | Bundeswehr, Munich, Germany                        |
| <i>Mycobacterium marinum</i>                  | DSMZ ID: 44344                                     |
| <i>Mycobacterium smegmatis</i>                | DSMZ ID: 43756                                     |
| <i>Mycobacterium avium ssp. Avium</i>         | DSMZ ID: 44156                                     |
| <i>Mycobacterium avium ssp. silvaticum</i>    | DSMZ ID: 44175                                     |
| <i>Mycobacterium intracellulare</i>           | DSMZ ID: 43223                                     |
| <i>Mycobacterium fortuitum ssp. Fortuitum</i> | DSMZ ID: 46621                                     |
| <i>Mycobacterium gordonae</i>                 | DSMZ ID: 43213                                     |
| <i>Mycobacterium kansasii</i>                 | DSMZ ID: 44162                                     |
| <i>Mycobacterium phlei</i>                    | DSMZ ID: 43239                                     |
| <i>Mycobacterium avium paratuberculosis</i>   | ATCC 19638                                         |
| <i>Rhodococcus equi</i>                       | ATCC 25729                                         |
| <i>Streptococcus uberis</i>                   | DSMZ ID: 20569                                     |

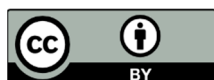

Supplement: tropicalmed-05-00157-s001.pdf [file tropicalmed-05-00157-s001.pdf]
